# Supplementary material for: Paediatric motor phenotypes in early‐onset ataxia, developmental coordination disorder, and central hypotonia
Source: PubMed Central journal article supplement — Dev Med Child Neurol. 2019 Sep 17;62(1):75–82. doi: 10.1111/dmcn.14355 (PMC6916203; doi:10.1111/dmcn.14355), 2019-09-17
Supplement: DMCN-62-75-s003.pdf [file DMCN-62-75-s003.pdf]

**Supplementary figure 1: Flow diagram of followed procedure**

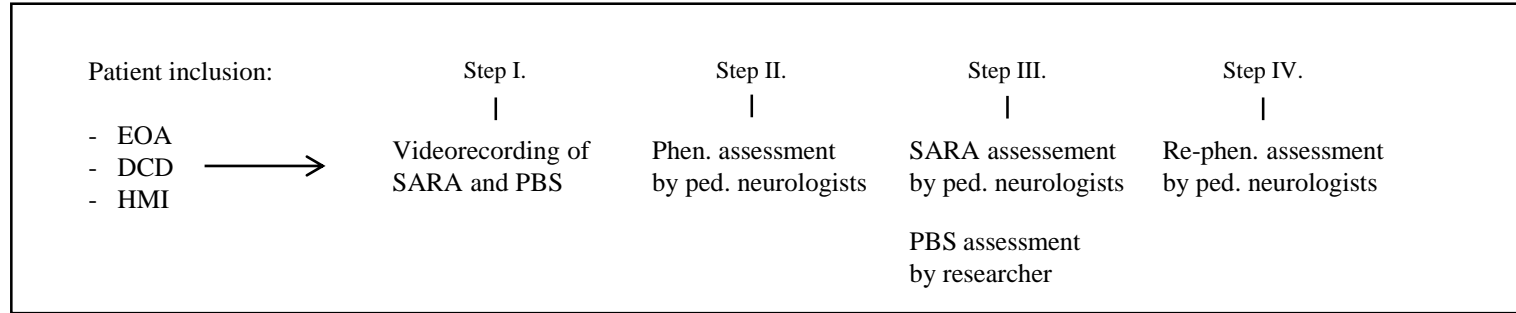

**Legend:** Flow diagram of followed procedures. We included clinically diagnosed EOA, DCD and HHM patients. Step I: Video recording of SARA and PBS performances. Step II: phenotypic assessment of video-recorded motor behavior. Step III: Scoring of video-recorded SARA and PBS performances. Step IV: Re-assessment after receiving standardized instructions for EOA recognition As EOA was completely discerned from HT in step II, step IV concerned the re-phenotyping of the inhomogeneously assessed EOA and DCD patients. The time interval between step II and III was more than 6 weeks. The time interval between step III and IV was more than 6 months. EOA = Early Onset Ataxia; DCD = Developmental Coordination Disorder; HMI = Hypotonic motor function inaccuracy; SARA = Scale and Assesement for Rating of Ataxia; PBS = Pediatric Balance Scale; phen. =phenotypic; ped. = pediatric
