# Supplementary material for: Paediatric motor phenotypes in early‐onset ataxia, developmental coordination disorder, and central hypotonia
Source: PubMed Central journal article supplement — Dev Med Child Neurol. 2019 Sep 17;62(1):75–82. doi: 10.1111/dmcn.14355 (PMC6916203; doi:10.1111/dmcn.14355), 2019-09-17
Supplement: DMCN-62-75-s004.pdf [file DMCN-62-75-s004.pdf]

**Supplementary figure 2: Phenotypic Assessment Form**

Child:  
Assessor:

Identify 1 primary feature and, if present, a maximum of 2 secondary features

Indicate in the squares the severity of the observed feature: mild (+), moderate (++) or severe (+++)

Indicate here which items were involved in your decision for primary and secondary feature: Gait (A), Kinetics (B), Speech (C). Multiple answers are allowed

Movement Disorder?

|                   |                                                        |                                                                                            |  |
|-------------------|--------------------------------------------------------|--------------------------------------------------------------------------------------------|--|
|                   | YES                                                    | NO                                                                                         |  |
| Primary feature   |                                                        |                                                                                            |  |
| Secondary feature |                                                        |                                                                                            |  |
|                   | Ataxia   Myoclonus   Tremor   Chorea   Dystonia   Tics | Spasticity   Clumsy/DCD   Central hypotonia   Immature for estimated age   Other (Specify) |  |
|                   |                                                        |                                                                                            |  |
